# Supplementary material for: Comparison of Three Expanded-Spectrum Cephalosporin Hydrolysis Assays and the NG-Test CTX-M Multi Assay That Detects All CTX-M-Like Enzymes
Source: MDPI journal article supplement (doi:10.3390/diagnostics12010197), 2022-01-14
Supplement: s1 [file s1]

*Supplemental Table S1:*

**COMPARISON OF THREE EXPANDED-SPECTRUM CEPHALOSPORIN HYDROLYSIS ASSAYS AND THE NG-TEST CTX-M MULTI ASSAY THAT DETECTS ALL CTX-M-LIKE ENZYMES**

Camille GONZALEZ<sup>1,2</sup>, Christian MOGUET<sup>3</sup>, Arnaud CHALIN<sup>4</sup>, Saoussen OUESLATI<sup>1,2</sup>, Laurent DORTET<sup>1,2,5</sup>, Stéphanie SIMON<sup>3</sup>, Hervé VOLLAND<sup>3</sup>, Thierry NAAS<sup>1,2,5\*</sup>

**Supplemental Table S1: Detailed results for the 93 bacterial isolates studied with each tested method.**

| #                        | Isolate    | Species                | $\beta$ -lactam resistance mechanisms <sup>a</sup> | $\beta$ -lactamase <sup>b</sup> | NG-Test <sup>®</sup><br>CTX-M MULTI | LFIA-CTX | $\beta$ -LACTA <sup>™</sup> | ESBL NDP         |
|--------------------------|------------|------------------------|----------------------------------------------------|---------------------------------|-------------------------------------|----------|-----------------------------|------------------|
| <i>Enterobacteriales</i> |            |                        |                                                    |                                 |                                     |          |                             |                  |
| 1                        | I8R8       | <i>E. coli</i>         | WT                                                 | None                            | -                                   | -        | -                           | -                |
| 2                        | D9O66      | <i>P. mirabilis</i>    | WT                                                 | None                            | -                                   | -        | -                           | -                |
| 3                        | SalR12-B2  | <i>Salmonella</i> spp. | WT                                                 | None                            | -                                   | -        | -                           | -                |
| 4                        | SalR10-A10 | <i>Salmonella</i> spp. | WT                                                 | None                            | -                                   | -        | -                           | -                |
| 5                        | 3F7        | <i>K. pneumoniae</i>   | WT, Chromosome-encoded penicillinase               | SHV-1                           | -                                   | -        | -                           | -                |
| 6                        | I10R8      | <i>K. pneumoniae</i>   | WT, Chromosome-encoded penicillinase               | SHV-28                          | -                                   | -        | -                           | -                |
| 7                        | 2E1        | <i>K. pneumoniae</i>   | WT, Chromosome-encoded penicillinase               | SHV-11                          | -                                   | -        | -                           | -                |
| 8                        | J2R8       | <i>C. freundii</i>     | WT                                                 | Low level CMY                   | -                                   | -        | -                           | -                |
| 9                        | J3R8       | <i>E. cloacae</i>      | WT                                                 | Low level ACT                   | -                                   | -        | -                           | -                |
| 10                       | D1O40      | <i>E. coli</i>         | CTX-M-enzyme lacking CTX hydrolysis                | CTX-M-93                        | positive                            | -        | -                           | -                |
| 11                       | 1I7        | <i>S. marscecens</i>   | Class A carbapenemase                              | SME-1                           | -                                   | -        | positive                    | ESBL             |
| 12                       | 1I3        | <i>E. cloacae</i>      | Class A carbapenemase                              | IMI-1                           | -                                   | -        | NI <sup>c</sup>             | -                |
| 13                       | 1I5        | <i>E. asburiae</i>     | Class A carbapenemase                              | IMI-2                           | -                                   | -        | -                           | -                |
| 14                       | CNR143D4   | <i>E. cloacae</i>      | Class A carbapenemase                              | IMI-17                          | -                                   | -        | -                           | -                |
| 15                       | 2G2        | <i>E. cloacae</i>      | Hyperexpressed AmpC                                | High level ACT                  | -                                   | positive | positive                    | -                |
| 16                       | 2E3        | <i>E. coli</i>         | Plasmid-encoded AmpC                               | ACC-1                           | -                                   | positive | positive                    | ESBL and/or AMPC |
| 17                       | 2E4        | <i>K. pneumoniae</i>   | Plasmid-encoded AmpC                               | DHA-2                           | -                                   | positive | positive                    | ESBL and/or AMPC |
| 18                       | I4O38      | <i>E. coli</i>         | Plasmid-encoded AmpC                               | CMY-136                         | -                                   | positive | -                           | ESBL and/or AMPC |
| 19                       | EC-R4      | <i>E. coli</i>         | ESBL                                               | CTX-M                           | positive                            | positive | positive                    | ESBL             |

|    |            |                      |      |                   |          |          |          |      |
|----|------------|----------------------|------|-------------------|----------|----------|----------|------|
| 20 | 3F8        | <i>E. aerogenes</i>  | ESBL | TEM-24            | -        | positive | positive | -    |
| 21 | 9.40       | <i>E. coli</i>       | ESBL | TEM-52 + CTX-M-15 | positive | positive | positive | ESBL |
| 22 | E10R13     | <i>E. cloacae</i>    | ESBL | GES-6             | -        | positive | -        | -    |
| 23 | 2E6        | <i>E. coli</i>       | ESBL | CTX-M-1           | positive | positive | positive | ESBL |
| 24 | A6R5       | <i>E. coli</i>       | ESBL | CTX-M-2           | positive | positive | positive | ESBL |
| 25 | 11.10      | <i>K. pneumoniae</i> | ESBL | CTX-M-3           | positive | positive | positive | ESBL |
| 26 | 11.176     | <i>E. coli</i>       | ESBL | CTX-M-8           | positive | positive | positive | ESBL |
| 27 | 11.175     | <i>K. pneumoniae</i> | ESBL | CTX-M-8           | positive | positive | positive | ESBL |
| 28 | 11.200     | <i>E. cloacae</i>    | ESBL | CTX-M-9           | positive | positive | positive | -    |
| 29 | E8O13      | <i>E. coli</i>       | ESBL | CTX-M-10          | positive | positive | -        | -    |
| 30 | 11.63      | <i>E. coli</i>       | ESBL | CTX-M-14          | positive | positive | positive | ESBL |
| 31 | 16.79      | <i>E. coli</i>       | ESBL | CTX-M-15          | positive | positive | positive | ESBL |
| 32 | 16.29      | <i>K. pneumoniae</i> | ESBL | CTX-M-15          | positive | positive | positive | ESBL |
| 33 | 9.17       | <i>E. cloacae</i>    | ESBL | CTX-M-15          | positive | positive | positive | ESBL |
| 34 | 11.204 CAP | <i>C. freundii</i>   | ESBL | CTX-M-15          | positive | positive | positive | ESBL |
| 35 | 16.60      | <i>E. coli</i>       | ESBL | CTX-M-17          | positive | positive | -        | -    |
| 36 | G1R4       | <i>K. pneumoniae</i> | ESBL | CTX-M-18          | positive | positive | positive | ESBL |
| 37 | G2R4       | <i>K. pneumoniae</i> | ESBL | CTX-M-19          | positive | positive | positive | ESBL |
| 38 | Red-93     | <i>E. coli</i>       | ESBL | CTX-M-24          | positive | positive | NI       | ESBL |
| 39 | 10.73      | <i>E. coli</i>       | ESBL | CTX-M-27          | positive | positive | NI       | ESBL |
| 40 | 10.64      | <i>E. coli</i>       | ESBL | CTX-M-32          | positive | positive | positive | ESBL |
| 41 | E3R12      | <i>E. coli</i>       | ESBL | CTX-M-37          | positive | positive | -        | ESBL |
| 42 | Red 88     | <i>E. coli</i>       | ESBL | CTX-M-55          | positive | positive | positive | ESBL |
| 43 | 10.231     | <i>E. coli</i>       | ESBL | CTX-M-57          | positive | positive | positive | ESBL |
| 44 | Red83A     | <i>E. coli</i>       | ESBL | CTX-M-65          | positive | positive | positive | ESBL |
| 45 | 11.110     | <i>P. mirabilis</i>  | ESBL | CTX-M-71          | positive | positive | positive | ESBL |

|                        |           |                      |                                              |                   |          |          |          |                  |
|------------------------|-----------|----------------------|----------------------------------------------|-------------------|----------|----------|----------|------------------|
| 46                     | 16.48     | <i>E. coli</i>       | ESBL                                         | CTX-M-82          | positive | positive | NI       | ESBL             |
| 47                     | 16.69     | <i>E. coli</i>       | ESBL                                         | CTX-M-101         | positive | positive | positive | ESBL             |
| 48                     | 1F1       | <i>E. coli</i>       | Class A carbapenemase                        | KPC-2             | -        | positive | positive | ESBL and/or AMPC |
| 49                     | 3F2       | <i>K. pneumoniae</i> | Class A carbapenemase +ESBL                  | KPC-3 + CTX-M     | positive | positive | positive | ESBL and/or AMPC |
| 50                     | 1A1       | <i>E. coli</i>       | Class B carbapenemase                        | NDM-1             | -        | positive | NI       | ESBL and/or AMPC |
| 51                     | CNR190E6  | <i>E. coli</i>       | Class B carbapenemase + ESBL                 | NDM-19 + CTX-M    | positive | positive | positive | ESBL and/or AMPC |
| 52                     | 1C3       | <i>E. coli</i>       | Class B carbapenemase + Plasmid-encoded AmpC | VIM-1 + CMY-13    | -        | positive | -        | ESBL and/or AMPC |
| 53                     | 1C9       | <i>K. pneumoniae</i> | Class B carbapenemase + ESBL                 | VIM-1 + SHV-5     | -        | positive | NI       | ESBL and/or AMPC |
| 54                     | 1D9       | <i>E. coli</i>       | Class B carbapenemase                        | IMP-1             | -        | positive | positive | ESBL and/or AMPC |
| 55                     | 1E5       | <i>K. pneumoniae</i> | Class B carbapenemase                        | IMP-8             | -        | positive | positive | ESBL and/or AMPC |
| 56                     | 2J3       | <i>K. pneumoniae</i> | Class D carbapenemase + ESBL                 | OXA-163 + CTX-M   | positive | positive | positive | ESBL and/or AMPC |
| 57                     | CNR172D10 | <i>E. coli</i>       | Class D carbapenemase                        | OXA-484           | -        | positive | positive | ESBL and/or AMPC |
| 58                     | 2J5       | <i>S. marcescens</i> | OXA-48-like enzyme hydrolysing ESCs          | OXA-405           | -        | positive | positive | ESBL and/or AMPC |
| 59                     | 2A1       | <i>E. coli</i>       | Class D carbapenemase + ESBL                 | OXA-48 + CTX-M-15 | positive | positive | positive | ESBL and/or AMPC |
| 60                     | 3G8       | <i>K. pneumoniae</i> | Class D carbapenemase + ESBL                 | OXA-370 + CTX-M-9 | positive | positive | positive | ESBL and/or AMPC |
| <i>Pseudomonas spp</i> |           |                      |                                              |                   |          |          |          |                  |
| 61                     | G7R1      | <i>P. putida</i>     | WT, Basal AmpC                               | Low level AMPC    | -        | -        | -        | -                |
| 62                     | G5R8      | <i>P. aeruginosa</i> | WT, Basal AmpC                               | Low level AMPC    | -        | -        | -        | -                |
| 63                     | carba1A8  | <i>P. aeruginosa</i> | Efflux (Mex C/D-OprJ)                        | Low level AMPC    | -        | -        | -        | -                |
| 64                     | carba1A9  | <i>P. aeruginosa</i> | Efflux (Mex A/B-OprM)                        | Low level AMPC    | -        | -        | -        | -                |

|                     |              |                      |                               |                                         |          |          |          |                  |
|---------------------|--------------|----------------------|-------------------------------|-----------------------------------------|----------|----------|----------|------------------|
| 65                  | E8R5         | <i>P. aeruginosa</i> | Plasmid-encoded penicillinase | CARB-4                                  | -        | -        | positive | ESBL             |
| 66                  | carba1H2     | <i>P. aeruginosa</i> | Acquired oxacillinase         | OXA-32                                  | -        | -        | NI       | -                |
| 67                  | D4O5         | <i>P. aeruginosa</i> | Acquired oxacillinase         | OXA-13                                  | -        | -        | positive | -                |
| 68                  | carba1F1     | <i>P. aeruginosa</i> | Class B carbapenemase         | AIM-1                                   | -        | -        | positive | ESBL and/or AMPC |
| 69                  | carba1F7     | <i>P. aeruginosa</i> | ESBL                          | PME-1                                   | -        | -        | positive | ESBL             |
| 70                  | pyo ctrl E6  | <i>P. aeruginosa</i> | ESBL                          | PER-1                                   | -        | positive | positive | ESBL and/or AMPC |
| 71                  | carba1F8     | <i>P. aeruginosa</i> | ESBL                          | CTX-M-2                                 | positive | positive | positive | ESBL and/or AMPC |
| 72                  | F1O26        | <i>P. aeruginosa</i> | ESBL                          | SHV-2a                                  | -        | positive | NI       | -                |
| 73                  | F1R7         | <i>P. aeruginosa</i> | ESBL                          | SHV-5                                   | -        | -        | positive | -                |
| 74                  | F2R7 ou C8O5 | <i>P. aeruginosa</i> | ESBL                          | TEM-4                                   | -        | -        | -        | -                |
| 75                  | F10O35       | <i>P. stutzeri</i>   | Class B carbapenemase         | DIM-1                                   | -        | positive | positive | ESBL and/or AMPC |
| 76                  | carba1B2     | <i>P. aeruginosa</i> | Class A carbapenemase         | GES-5                                   | -        | -        | -        | ESBL             |
| 77                  | Carba1A4     | <i>P. aeruginosa</i> | Class A carbapenemase         | KPC-2                                   | -        | positive | positive | ESBL and/or AMPC |
| 78                  | carba1E2     | <i>P. aeruginosa</i> | Class B carbapenemase         | NDM-1                                   | -        | positive | NI       | -                |
| 79                  | C3O51        | <i>P. aeruginosa</i> | Class B carbapenemase         | VIM-2                                   | -        | positive | NI       | ESBL and/or AMPC |
| 80                  | carbaD2      | <i>P. stutzeri</i>   | Class B carbapenemase         | IMP-1                                   | -        | positive | positive | ESBL and/or AMPC |
| 81                  | carba2B7     | <i>P. aeruginosa</i> | Class B carbapenemase         | IMP-26                                  | -        | positive | positive | ESBL and/or AMPC |
| <i>A. baumannii</i> |              |                      |                               |                                         |          |          |          |                  |
| 82                  | ctrl A9      | <i>A. baumannii</i>  | Acquired penicillinase        | RTG-4                                   | -        | -        | positive | -                |
| 83                  | ctrlB3       | <i>A. baumannii</i>  | Overexpressed AmpC            | High level ADC                          | -        | positive | positive | -                |
| 84                  | carba1A10    | <i>A. baumannii</i>  | Overexpressed AmpC+ OXA       | High level ADC + OXA-21 (penicillinase) | -        | positive | positive | ESBL and/or AMPC |
| 85                  | ctrlA7       | <i>A. baumannii</i>  | ESBL                          | PER-1                                   | -        | positive | positive | ESBL and/or AMPC |
| 86                  | ctrlH9       | <i>A. baumannii</i>  | ESBL                          | VEB-1                                   | -        | positive | NI       | -                |
| 87                  | H10R8        | <i>A. baumannii</i>  | ESBL                          | CTX-M-15                                | positive | positive | NI       | -                |

|    |           |                     |                       |                                |   |          |          |                  |
|----|-----------|---------------------|-----------------------|--------------------------------|---|----------|----------|------------------|
| 88 | F5O22     | <i>A. baumannii</i> | Class B carbapenemase | SIM-1                          | - | positive | NI       | -                |
| 89 | metalloI2 | <i>A. baumannii</i> | Class B carbapenemase | IMP-4                          | - | positive | positive | ESBL and/or AMPC |
| 90 | OXA-58 J3 | <i>A. baumannii</i> | Class D carbapenemase | OXA-253                        | - | positive | positive | ESBL and/or AMPC |
| 91 | OXA-58 A8 | <i>A. baumannii</i> | Class D carbapenemase | High level<br>ADC + OXA-<br>58 | - | positive | -        | -                |
| 92 | metalloB2 | <i>A. baumannii</i> | Class A carbapenemase | GES-11                         | - | positive | positive | ESBL and/or AMPC |
| 93 | mG7       | <i>A. baumannii</i> | Class A carbapenemase | GES-14                         | - | positive | positive | ESBL             |

<sup>a</sup>  $\beta$ -lactam resistance mechanisms: corresponds to the phenotype conferred by the main  $\beta$ -lactamase encountered in the isolate.

<sup>b</sup>  $\beta$ -lactamase content. When no acquired enzyme, the level of expression of naturally encoded enzymes is indicated. When acquired enzymes are present, only the latter are indicated.

<sup>c</sup>NI: Non-Interpretable
